# Supplementary material for: Sex Differences in Treatments, Relative Survival, and Excess Mortality Following Acute Myocardial Infarction: National Cohort Study Using the SWEDEHEART Registry
Source: PubMed Central journal article supplement — J Am Heart Assoc. 2017 Dec 14;6(12):e007123. doi: 10.1161/JAHA.117.007123 (PMC5779025; doi:10.1161/jaha.117.007123), 2017-12-14
Supplement: JAH3-6-e007123-s001.pdf [file JAH3-6-e007123-s001.pdf]

# **SUPPLEMENTAL MATERIAL**



**Table S2.** Baseline and clinical characteristics for the 2003–2013 AMI cohort with missing levels, stratified by clinical presentation

|                                            | STEMI N=60,712 | NSTEMI N=119,656 |
|--------------------------------------------|----------------|------------------|
| Age                                        | 0              | 0                |
| Male (%)                                   | 0              | 0                |
| <b>Year of hospitalisation</b>             |                |                  |
| 2003-05                                    | 0              | 0                |
| 2006-08                                    | 0              | 0                |
| 2009-11                                    | 0              | 0                |
| 2012-13                                    | 0              | 0                |
| <b>Risk factors</b>                        |                |                  |
| Diabetes mellitus                          | 0              | 0                |
| Hypertension                               | 0              | 0                |
| Current/ex-smoker                          | 4,813 (7.9%)   | 11,270 (9.4%)    |
| <b>Prior cardiovascular diseases</b>       |                |                  |
| Myocardial infarction                      | 0              | 0                |
| Heart failure                              | 0              | 0                |
| PCI                                        | 0              | 0                |
| CABG                                       | 0              | 0                |
| Cerebrovascular disease                    | 0              | 0                |
| PVD                                        | 0              | 0                |
| <b>Other comorbidities</b>                 |                |                  |
| Chronic renal failure                      | 0              | 0                |
| COPD                                       | 0              | 0                |
| <b>Presenting clinical characteristics</b> |                |                  |
| Systolic BP                                | 9,597 (15.8%)  | 19,153 (16.0%)   |
| Heart rate                                 | 9,015 (14.9%)  | 17,802 (14.9%)   |
| ST-segment deviation                       | 213 (0.4%)     | 2,152 (1.8%)     |
| <b>In-hospital course</b>                  |                |                  |
| Cardiac arrest                             | 13 (0.0%)      | 58 (0.1%)        |
| Loop diuretic administration               | 347 (0.6%)     | 678 (0.6%)       |
| Reperfusion                                | 842 (1.4%)     | -                |
| Revascularisation                          | 0              | 0                |
| <b>Guideline-indicated treatments</b>      |                |                  |
| Aspirin                                    | 673 (1.1%)     | 957 (0.8%)       |
| β-blockers                                 | 582 (1.0%)     | 865 (0.7%)       |
| Statin                                     | 610 (1.0%)     | 950 (0.8%)       |
| ACEi or ARB                                | 4,291 (7.1%)   | 8,888 (7.4%)     |
| P2Y <sub>12</sub> inhibitors               | 552 (0.9%)     | 829 (0.7%)       |

Abbreviations: PCI, percutaneous coronary intervention; CABG, coronary artery bypass graft; PVD, peripheral vascular disease; COPD, chronic obstructive pulmonary disease; BP, blood pressure; reperfusion, fibrinolysis or primary percutaneous coronary intervention [PCI]; revascularisation, PCI or coronary artery bypass graft [CABG] surgery ACEi, angiotensin converting enzyme ARB, angiotensin receptor blocker; -, not applicable.

**Table S3.** Baseline characteristics stratified by sex and age group for STEMI

|                         | STEMI N=60,712   |               |               |               |               |                |               |               |               |             |
|-------------------------|------------------|---------------|---------------|---------------|---------------|----------------|---------------|---------------|---------------|-------------|
|                         | Women (N=20,140) |               |               |               |               | Men (N=40,572) |               |               |               |             |
|                         | ≤55              | 55-65         | 66-75         | 76-85         | >85           | ≤55            | 55-65         | 66-75         | 76-85         | >85         |
| Diabetes                | 292 (16.1%)      | 482 (15.1%)   | 888 (18.1%)   | 1,310 (19.2%) | 552 (16.2%)   | 809 (10.5%)    | 1,573 (13.6%) | 1,758 (16.1%) | 1,505 (18.3%) | 327 (15.0%) |
| Myocardial infarction   | 88 (4.9%)        | 230 (7.2%)    | 465 (9.5%)    | 930 (13.7%)   | 633 (18.6%)   | 466 (6.1%)     | 1,093 (9.4%)  | 1,511 (13.9%) | 1,690 (20.6%) | 518 (23.7%) |
| Heart failure           | 27 (1.5%)        | 53 (1.7%)     | 179 (3.7%)    | 540 (7.9%)    | 470 (13.8%)   | 56 (0.7%)      | 181 (1.6%)    | 387 (3.6%)    | 645 (7.8%)    | 257 (11.8%) |
| PCI                     | 57 (3.2%)        | 145 (4.5%)    | 219 (4.5%)    | 216 (3.2%)    | 84 (2.5%)     | 327 (4.3%)     | 732 (6.3%)    | 772 (7.1%)    | 535 (6.5%)    | 74 (3.4%)   |
| CABG                    | 15 (0.8%)        | 50 (1.6%)     | 117 (2.4%)    | 178 (2.6%)    | 55 (1.6%)     | 103 (1.3%)     | 341 (2.9%)    | 562 (5.2%)    | 535 (6.5%)    | 85 (3.9%)   |
| Cerebrovascular disease | 35 (1.9%)        | 123 (3.8%)    | 318 (6.5%)    | 807 (11.9%)   | 492 (14.4%)   | 125 (1.6%)     | 406 (3.5%)    | 788 (7.2%)    | 1,062 (12.9%) | 365 (16.7%) |
| PVD                     | 26 (1.4%)        | 71 (2.2%)     | 212 (4.3%)    | 337 (5.0%)    | 187 (5.5%)    | 61 (0.8%)      | 212 (1.8%)    | 452 (4.2%)    | 435 (5.3%)    | 127 (5.8%)  |
| Chronic renal failure   | 31 (1.7%)        | 35 (1.1%)     | 82 (1.7%)     | 134 (2.0%)    | 90 (2.6%)     | 47 (0.6%)      | 127 (1.1%)    | 183 (1.7%)    | 254 (3.1%)    | 106 (4.9%)  |
| Hypertension            | 576 (31.8%)      | 1,310 (40.9%) | 2,302 (46.9%) | 3,672 (53.9%) | 1,864 (54.7%) | 1,797 (23.4%)  | 3,986 (34.4%) | 4,370 (40.1%) | 3,604 (43.8%) | 944 (43.2%) |
| COPD                    | 45 (2.5%)        | 224 (7.0%)    | 419 (8.5%)    | 513 (7.5%)    | 157 (4.6%)    | 58 (0.8%)      | 320 (2.8%)    | 562 (5.2%)    | 576 (7.0%)    | 140 (6.4%)  |

Abbreviations: PCI, percutaneous coronary intervention; CABG, coronary artery bypass graft; PVD, peripheral vascular disease; COPD, chronic obstructive pulmonary disease.

**Table S4.** Baseline characteristics stratified by sex and age group for NSTEMI

|                         | NSTEMI N=119,656 |               |               |                |               |                |               |                |                |               |
|-------------------------|------------------|---------------|---------------|----------------|---------------|----------------|---------------|----------------|----------------|---------------|
|                         | Women (N=45,254) |               |               |                |               | Men (N=74,402) |               |                |                |               |
|                         | ≤55              | 55-65         | 66-75         | 76-85          | >85           | ≤55            | 55-65         | 66-75          | 76-85          | >85           |
| Diabetes                | 536 (18.5%)      | 1,258 (22.1%) | 2,759 (25.8%) | 4,238 (24.9%)  | 1,719 (19.2%) | 1,204 (13.7%)  | 3,409 (20.8%) | 5,314 (25.3%)  | 5,188 (24.6%)  | 1,269 (18.1%) |
| Myocardial infarction   | 213 (7.4%)       | 710 (12.5%)   | 1,979 (18.5%) | 4,412 (25.9%)  | 2,812 (31.4%) | 867 (9.8%)     | 2,808 (17.1%) | 5,498 (26.1%)  | 7,329 (34.7%)  | 2,690 (38.4%) |
| Heart failure           | 61 (2.1%)        | 252 (4.4%)    | 979 (9.2%)    | 2,793 (16.4%)  | 2,085 (23.3%) | 183 (2.1%)     | 818 (6.0%)    | 2,130 (10.1%)  | 3,630 (17.2%)  | 1,621 (23.1%) |
| PCI                     | 130 (4.5%)       | 418 (7.3%)    | 903 (8.5%)    | 1,127 (6.6%)   | 279 (3.1%)    | 666 (7.6%)     | 1,729 (10.5%) | 2,729 (13.0%)  | 2,230 (10.6%)  | 409 (5.8%)    |
| CABG                    | 57 (2.0%)        | 246 (4.3%)    | 685 (6.4%)    | 1,154 (6.8%)   | 351 (3.9%)    | 275 (3.1%)     | 1,341 (8.2%)  | 2,966 (14.1%)  | 3,388 (16.0%)  | 729 (10.4%)   |
| Cerebrovascular disease | 87 (3.0%)        | 298 (5.2%)    | 1,061 (9.9%)  | 2,484 (14.6%)  | 1,405 (15.7%) | 199 (2.3%)     | 898 (5.5%)    | 2,258 (10.7%)  | 3,566 (16.9%)  | 1,268 (18.1%) |
| PVD                     | 61 (2.1%)        | 263 (4.6%)    | 709 (6.6%)    | 1,399 (8.2%)   | 689 (7.7%)    | 121 (1.4%)     | 571 (3.5%)    | 1,628 (7.7%)   | 2,169 (10.3%)  | 552 (7.9%)    |
| Chronic renal failure   | 87 (3.0%)        | 148 (2.6%)    | 343 (3.2%)    | 595 (3.5%)     | 349 (3.9%)    | 168 (1.9%)     | 364 (2.2%)    | 769 (3.7%)     | 1,231 (5.8%)   | 459 (6.5%)    |
| Hypertension            | 945 (32.7%)      | 2,589 (45.4%) | 5,856 (54.8%) | 10,005 (58.8%) | 5,061 (56.6%) | 2,631 (29.9%)  | 6,994 (42.6%) | 10,260 (48.8%) | 10,440 (49.4%) | 3,111 (44.4%) |
| COPD                    | 94 (3.3%)        | 512 (9.0%)    | 1,333 (12.5%) | 1,653 (9.7%)   | 538 (6.0%)    | 115 (1.3%)     | 704 (4.3%)    | 1,686 (8.0%)   | 2,109 (10.0%)  | 594 (8.5%)    |

Abbreviations: PCI, percutaneous coronary intervention; CABG, coronary artery bypass graft; PVD, peripheral vascular disease; COPD, chronic obstructive pulmonary disease.

**Table S5.** Unadjusted and adjusted odd ratios with 95% CIs for STEMI and NSTEMI women who received treatment at discharge compared with men

| Treatments at discharge      | STEMI (N=60,712) |         |                   |         | NSTEMI (N=119,656) |         |                  |         |
|------------------------------|------------------|---------|-------------------|---------|--------------------|---------|------------------|---------|
|                              | Unadjusted       | P value | Adjusted*         | P value | Unadjusted         | P value | Adjusted*        | P value |
| Aspirin                      | 0.61 (0.57-0.64) | <0.001  | 0.84 (0.79-0.89)  | <0.001  | 0.71 (0.69- 0.74)  | <0.001  | 0.85 (0.82-0.88) | <0.001  |
| β-blockers                   | 0.67 (0.64-0.70) | <0.001  | 0.88 (0.84-0.93)  | <0.001  | 0.83 (0.81-0.86)   | <0.001  | 0.97 (0.93-1.00) | 0.047   |
| Statin                       | 0.47 (0.45-0.49) | <0.001  | 0.76 (0.72-0.80)  | <0.001  | 0.54 (0.53-0.56)   | <0.001  | 0.75 (0.73-0.77) | <0.001  |
| ACEi or ARB                  | 0.68 (0.65-0.71) | <0.001  | 0.78 (0.74-0.81)  | <0.001  | 0.83 (0.81-0.85)   | <0.001  | 0.86 (0.84-0.89) | <0.001  |
| P2Y <sub>12</sub> inhibitors | 0.59 (0.57-0.61) | <0.001  | 0.83 (0.80- 0.87) | <0.001  | 0.70 (0.69-0.72)   | <0.001  | 0.87 (0.85-0.89) | <0.001  |
| Reperfusion                  | 0.57 (0.55-0.59) | <0.001  | 0.80 (0.77-0.84)  | <0.001  | -                  | -       | -                | -       |
| Revascularisation            | 0.46 (0.44-0.48) | <0.001  | 0.66 (0.63-0.69)  | <0.001  | 0.46 (0.45-0.47)   | <0.001  | 0.57 (0.55-0.58) | <0.001  |

ACEi, angiotensin converting enzyme inhibitor; ARB, angiotensin receptor blocker; reperfusion, fibrinolysis or primary percutaneous coronary intervention [PCI]; revascularisation, PCI or coronary artery bypass graft [CABG] surgery; -, not applicable.
